# Supplementary material
Source: publisher site journal article supplement (https://www.dovepress.com/article/245396)
Supplement: Supplementary file 1 [file get_supplementary_file.php]

**Supplementary Table 1** Simple effect analysis: a comparison at different time points

|  | | Pre-TACE vs. 3-6 weks post TACE (*P*12) | Pre-TACE vs. 3-6 weks post TACE (*P*13) | 3-6 weks vs. 3 months post TACE (*P*23) |
| --- | --- | --- | --- | --- |
| WBC | Responders | 0.007 | <0.001 | 0.023 |
|  | Non-esponders | 0.198 | 0.004 | 0.257 |
| Neutrophils | Responders | 0.015 | <0.001 | 0.984 |
|  | Non-esponders | 0.175 | 0.096 | 0.984 |
| Lymphocytes | Responders | 0.564 | 0.710 | 0.999 |
|  | Non-esponders | 0.252 | <0.001 | 0.005 |
| NLR | Responders | 0.800 | 0.165 | 0.123 |
|  | Non-esponders | 0.995 | 0.048 | 0.412 |

**Supplementary table 2** Simple effect analysis: a comparison between responders and non-responders

|  | Pre-TACE | | 3-6 weks post TACE | | 3 months post TACE | |
| --- | --- | --- | --- | --- | --- | --- |
|  | F | *P* | F | *P* | F | *P* |
| WBC | 0.078 | 0.780 | 0.206 | 0.651 | 0.905 | 0.343 |
| Neutrophils | 0.001 | 0.976 | 0.371 | 0.543 | 4.921 | 0.028 |
| Lymphocytes | 0.735 | 0.392 | 1.337 | 0.249 | 8.616 | 0.004 |
| NLR | 0.178 | 0.673 | 0.040 | 0.842 | 10.189 | 0.002 |

**Supplementary table 3** Association between neutrophils and lymphocyte grouping and tumor response at different time points

|  |  |  | Responders | Non-responders | *P*† |
| --- | --- | --- | --- | --- | --- |
| Neutrophil | Pre-TACE | High | 56 | 49 | 0.926 |
|  |  | Low | 40 | 36 |  |
|  | 3-6 weeks post TACE | High | 55 | 48 | 0.911 |
|  |  | Low | 41 | 37 |  |
|  | 3 months post TACE | High | 68 | 47 | 0.030 |
|  |  | Low | 28 | 38 |  |
| Lymphocyte | Pre-TACE | High | 52 | 52 | 0.341 |
|  |  | Low | 44 | 33 |  |
|  | 3-6 weeks post TACE | High | 52 | 50 | 0.528 |
|  |  | Low | 44 | 35 |  |
|  | 3 months post TACE | High | 37 | 54 | 0.001 |
|  |  | Low | 59 | 31 |  |

**Notes:** † The value of *P* comes from the chi-square test. Patients were divided into two groups (high vs. low) according to the mean value of neutrophil and lymphocyte at different time points.
